# Supplementary material for: Texture, Color, and Sensory Features of Low-Sugar Gooseberry Jams Enriched with Plant Ingredients with Prohealth Properties
Source: Hindawi journal article supplement (doi:10.1155/2018/1646894), 2018-01-01
Supplement: f1 [file 1646894.f1.doc]

**Description of the quality features used in the sensory evaluation of the examined jams**

| **Quality feature** | **Weighting**  **coefficient** | **Points** | | | | |
| --- | --- | --- | --- | --- | --- | --- |
| **5** | **4** | **3** | **2** | **1** |
| **1.**  **External appearance of the product** |  | | | | | |
| **a)** **Surface** (syneresis) | **2** | very shiny, smooth, no syneresis | shiny, even, no syneresis | poorly shiny, even, light leak of juice | slightly dull, uneven, juice leak | dull, uneven, strong juice leak |
| **b)** **Structure** (disposition of fruit parts in the content of jam) | **3** | shredded fruit, evenly distributed in a well-gelatinized jelly that forms a uniform mass with the fruit | shredded fruits well distributed in the gelatinized jelly | shredded fruits distributed in too soft or too hard jelly, easily separating from the jelly | shredded fruits unevenly distributed in a soft, non-gelled mass | lack of jelly structure |
| **c) Color** | **4** | very typical and very uniform | typical and uniform | slightly changed and not very uniform | strongly changed and irregular | atypical and foreign |
| **2.**  **Consistency** | **3** | very well spreadability, uniform, dense, not too hard and not too soft | well spreadability, uniform, a little too soft or too hard | medium spreadability, medium uniform, a bit too soft or too hard | no spreadability, not very uniform, hard or soft | dry or watery |
| **3.**  **Aroma** (type and desirability) | **4** | very typical, very intense, very desirable | typical, intense, desirable | moderately typical, medium intense and desirable | scarcely typical, not very intense and desirable | atypical, foreign, undesirable |
| **4.**  **Taste** (type and desirability) | **4** | very typical, very desirable | typical, desirable | moderately typical and moderately desirable | not very typical and desirable | atypical, foreign, undesirable |
